# Supplementary material
Source: HighWire-hosted journal article supplement (https://bmjopen.bmj.com/content/12/9/e058886)
Supplement: inline-supplementary-material-1 [file inline-supplementary-material-1.pdf]

## Appendix: Search Strategies

### PubMed

- #1 "Coronary Disease"[Mesh] or "Left Main Disease\*"[tw] or "Coronary Arteriosclerosis\*"[tw]  
#2 "Coronary Artery Bypass"[Mesh] or "Myocardial Revascularization"[Mesh] or "Angioplasty, Balloon, Coronary"[Mesh] or "CABG"[tw]  
**#3 #1 OR #2**  
#4 "Surgical Procedures, Operative"[Mesh] or "Off-Pump Coronary Artery Bypass"[tw] or "Off-Pump Coronary Artery Bypass"[tw]  
#5 "Percutaneous Coronary Intervention"[Mesh] or "Robotic Surgical Procedures"[Mesh] or "Video-Assisted Surgery"[Mesh] or "Thoroscopes"[Mesh] or "Thoracotomy"[Mesh]  
#6 "Traditional thoracotomy"[tw] or "Conventional Surgery"[tw] or "Hybrid"[tw]  
**#7 #4 or #5 or #6**  
#8 "random\*"[tw] or "controlled"[tw] or "trial\*"[tw] or "groups"[tw]  
#9 ("singl\*"[tw] or "doubl\*"[tw] or "tripl\*"[tw]) and ("mask\*"[tw] or "blind\*"[tw])  
**#10 #8 or #9**  
**#11 #3 and #7 AND #10**

### Embase (Elsevier)

- #1 'Coronary Disease'/exp  
#2 'Coronary Artery Disease'/exp  
#3 ("Left Main Diseases" or "Coronary Arteriosclerosis" or CABG): ti,ab  
**#4 #1 or #2 or #3**  
#5 'surgery'/exp  
#6 "Operative Procedure": ti,ab  
**#7 #5 or #6**  
#8 'Percutaneous Coronary Intervention'/exp  
#9 "Percutaneous Coronary Revascularizations": ti,ab  
**#10 #8 or #9**  
#11 'Robotic Surgical Procedures'/exp  
#12 ("Robotic-Assisted Surgery" or "Robot Surgery"): ti,ab  
**#13 #11 or #12**  
#14 "Video Assisted Surgery": ti,ab  
#15 'Video-Assisted Surgery'/exp  
**#16 #14 or #15**  
#17 'Thoroscopes'/exp  
#18 ("Pleuroscop\*" or Thoracoscopy or "Endoscop\*"): ti,ab

**#19 #17 or #18**

#20 ‘Thoracotomy’/exp

#21 (“Sternotom\*” or “thoracotom\*” or “hybrid”): ti,ab

**#22 #20 or #21**

**#23 #7 or #10 or #13 or #16 or #19 or #22**

#24 (“random\*” or “control\*” or “trial\*” or placebo): ti,ab

#25 (“singl\*” or “doubl\*” or “tripl\*”) and (“mask\*” or “blind\*”): ti,ab

**#26 #23 or #24**

**#27 #4 AND #23 AND #26**

## Web of Science

#1 “Coronary Artery Disease” or “Coronary Disease”

#2 “Left Main Disease\*” or “Coronary Arteriosclerosis\*”

#3 “Coronary Artery Bypass” or “Coronary Artery Bypass, Off Pump” or “Myocardial Revascularization”

#4 “Off-Pump Coronary Artery Bypass” or “Beating Heart Coronary Artery Bypass”

**#5 #1 or #2 or #3 or #4**

#6 “Surgical Procedures, Operative” or “Operative Surgical Procedure”

#7 “Percutaneous Coronary Intervention” or “Percutaneous Coronary Revascularizations”

#8 “Robot Surger\*” or “Robotic-Assisted Surger\*” or “Robotic Surgical Procedures”

#9 “Video-Assisted Surger\*” or “Video Assisted Surger\*”

#10 “Thoroscop\*” or “Pleuroscope\*” or “Endoscop\*”

#11 “Thoracotom\*” or “Thoracic Surgery” or “Sternotom\*”

**#12 #6 or #7 or #8 or #9 or #10 or #11**

**#13 #5 and #12**

## The Cochrane Library (Wiley Online Library)

#1 MeSH descriptor ‘Coronary Disease’ explode all trees

#2 (“Left Main Diseases” or “Coronary Arteriosclerosis”): ti,ab,kw

#3 MeSH descriptor ‘Coronary Artery Bypass’ explode all trees

#4 (“Off-Pump Coronary Artery Bypass” or “Beating Heart Coronary Artery Bypass”): ti,ab,kw

**#5 #1 or #2 or #3 or #4**

#6 MeSH descriptor ‘Operative Surgical Procedure’ explode all trees

#7 (“Operative Procedure\*” or “Surgery, Ghost” or Surgery): ti,ab,kw

#9 MeSH descriptor ‘Percutaneous Coronary Intervention’ explode all trees

#10 “Percutaneous Coronary Revascularizations”: ti,ab

#12 MeSH descriptor ‘Robotic Surgical Procedures’ explode all trees

#13 (“Robot Surger\*” or “Robotic-Assisted Surgery\*”): ti,ab

#14 MeSH descriptor ‘Video-Assisted Surgery’ explode all trees

#15 (“Video Assisted Surgery”: or Thoracosopes): ti,ab,kw:

#16 MeSH descriptor ‘Sternotomy’ explode all trees

#17 “Traditional thoracotomy” or “Median thoracotomy”: ti,ab,kw:

**#18 #6 or #7 or #8 or #9 or #10 or #11 or #12 or #13 or #14 or #15 or #16 or #17**

**#19 #5 and #18** in Trials
